# Supplementary material
Source: PubMed Central journal article supplement (PMC4975533)
Supplement: NIHMS790808-supplement-Supplemental_Data.pdf [file NIHMS790808-supplement-Supplemental_Data.pdf]

## Supplemental Data

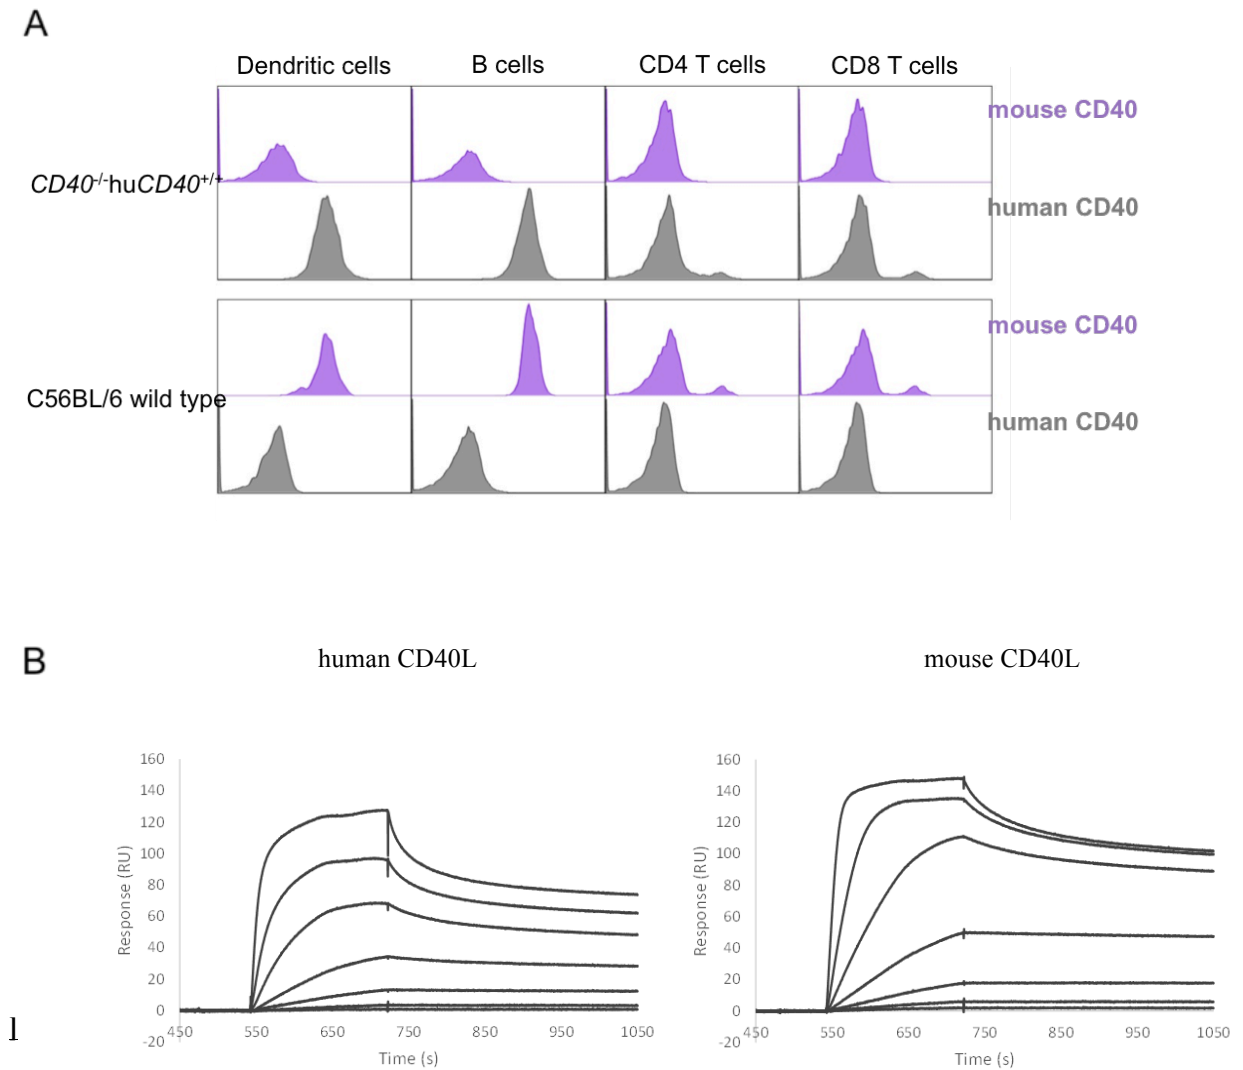

**Figure S1, Related to Figure 1. Binding of hCD40 to mouse and human CD40L.**

(A) Representative flow cytometry staining of hCD40 expression on the indicated splenic cell populations in *CD40<sup>-/-</sup>huCD40<sup>+/+</sup>* and wild type mice

(B) SPR analysis with immobilized human CD40 and soluble human/mouse CD40L titrated from 33 to 0.5nM.

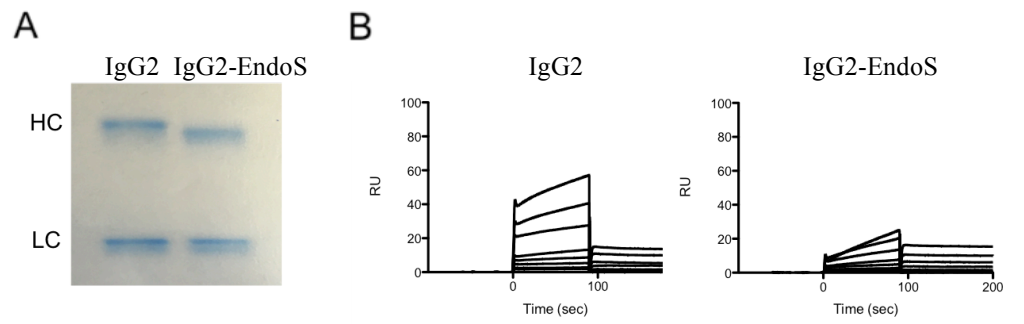

**Figure S2, Related to Figures S. Characterization of deglycosylated CP-870,893-IgG2.**

- (A) SDS-PAGE characterization of IgG2 and IgG2 treated with EndoS. Reduced molecular weight size of the heavy chain of the EndoS-treated IgG2 compared to wild type implies on its deglycolisation. HC, heavy chain; LC, light chain.
- (B) SPR analysis of the binding of CP-870,893 IgG2 and deglycosylated-IgG2 to human Fc $\gamma$ RIIB.

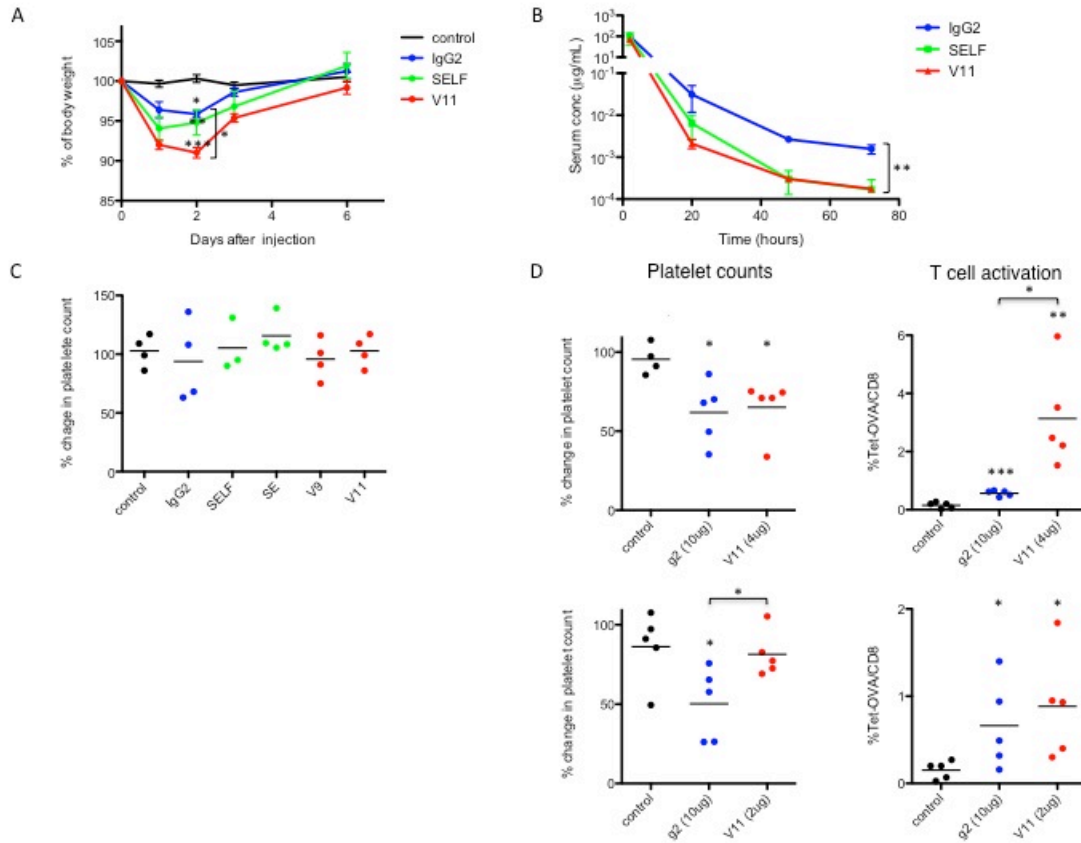

**Figure S3, Related to Figures 3. Increased activity of CP-870,893 anti-CD40 human IgG by Fc-engineering for selective FcγRIIB enhancement.**

- A) Change in total body weight over time after single injection of CP-870,893 Fc variant into humanized FcγR/CD40 mice. Data represented as mean +/- SEM. n=4.
- B) Serum concentrations over time after single injection of CP-870,893 IgG2, IgG1-SELF, and IgG1-V11 Fc variants. Data are represented as mean ± SEM. n=3.
- C) Platelet counts in humanized CD40/ FcγR mice blood 7 days after administration of CP-870,893 anti-CD40 Fc variants. Each dot represents individual mouse.
- D) 2.5-fold (upper panel) and 5-fold (lower panel) reduced dose of CP-870,893-V11 compared to CP-870,893-IgG2 was injected to hCD40/FcγR mice combined with DEC-OVA. Relative platelet counts after 24 hours (left) and percentages of OVA<sup>+</sup> of CD8 T cell at day 7 (right) are shown. Each dot represents individual mouse.

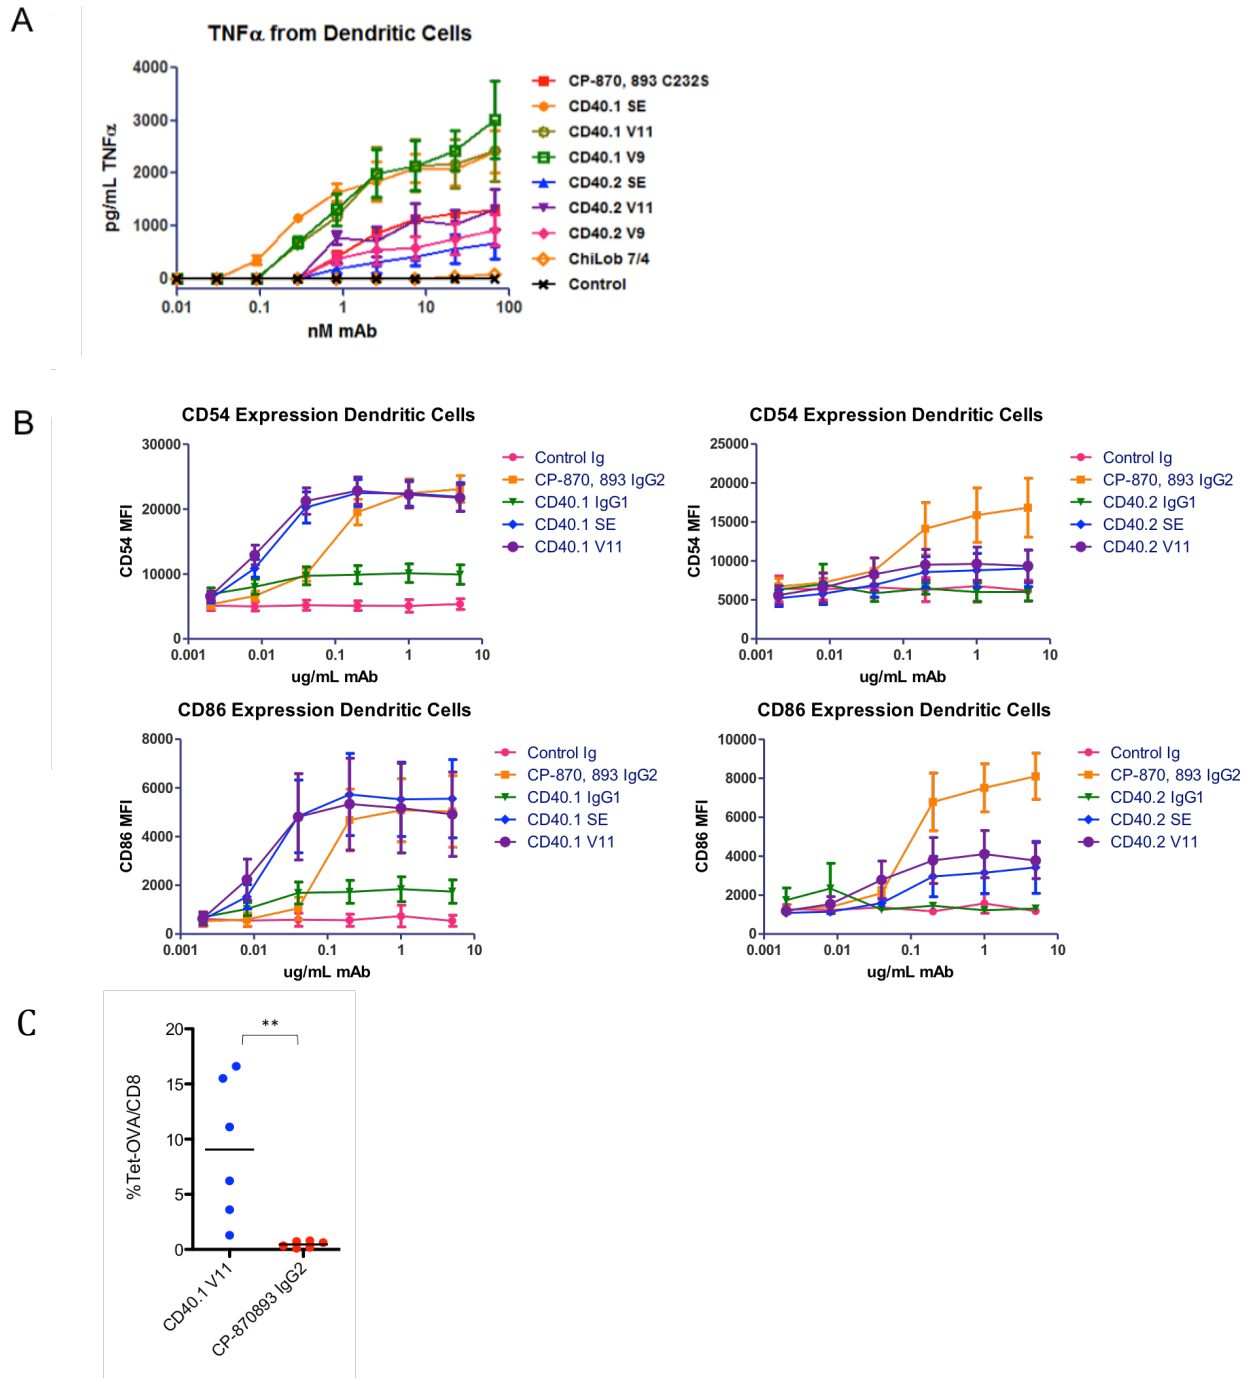

**Figure S4, Related to Figure 4. Multiple agonistic, anti-CD40 antibodies demonstrate Fc $\gamma$ RIIB-mediated enhancement, regardless of the epitopes they recognize.**

- (A) Immature dendritic cells were incubated in vitro with the indicated anti-human CD40 mAbs and were analyzed for secretion of TNF- $\alpha$ . Data from 2-3 donors were averaged and SEM is shown.
- (B) Immature dendritic cells were incubated in vitro with the indicated anti-human CD40 mAbs and were analyzed in flow cytometry for their upregulation of the activation markers CD54 and CD86. Data from 3 donors were averaged and SEM is shown.
- (C) The indicated CD40 Abs were injected to hCD40/Fc $\gamma$ R mice in together with DEC-OVA. Percentages of OVA<sup>+</sup> of CD8 T cell at day 7 are shown. Each dot represents individual

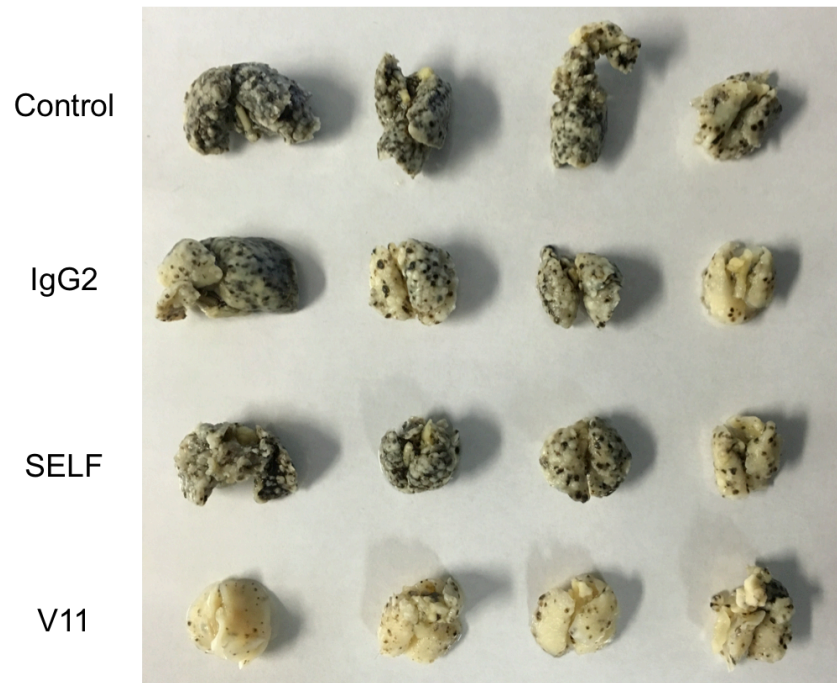

**Figure S5, related to Figure 5. Superior anti-tumor activity of V11 Fc variant of CP-870,893.**  
Effect of CP-870,893 anti-CD40 Fc variants on the frequencies of lung metastases. Humanized CD40/Fc $\gamma$ R mice were injected intravenously with B16 melanoma cells and treated with the indicated anti-CD40 Ab. Images are shown for lung that were harvested at day 13 post injection.

| Fc Variant                                | Ka (1/Ms)              | Kd (1/s)               | KD (M)                 |
|-------------------------------------------|------------------------|------------------------|------------------------|
| IgG1                                      | 5.973 *10 <sup>4</sup> | 1.189*10 <sup>-3</sup> | 1.991*10 <sup>-8</sup> |
| IgG1-N297A                                | 5.234 *10 <sup>4</sup> | 1.161*10 <sup>-3</sup> | 2.219*10 <sup>-8</sup> |
| IgG1-S267E                                | 4.999 *10 <sup>4</sup> | 1.155*10 <sup>-3</sup> | 2.309*10 <sup>-8</sup> |
| IgG1-S267E/L328F                          | 4.232 *10 <sup>4</sup> | 1.159*10 <sup>-3</sup> | 2.738*10 <sup>-8</sup> |
| IgG1- G237D/P238D/P271G/A330R (V9)        | 4.217 *10 <sup>4</sup> | 1.129*10 <sup>-3</sup> | 2.678*10 <sup>-8</sup> |
| IgG1- G237D/P238D/H268D/P271G/A330R (V11) | 4.1 *10 <sup>4</sup>   | 1.125*10 <sup>-3</sup> | 2.743*10 <sup>-8</sup> |
| IgG2                                      | 3.486*10 <sup>4</sup>  | 1.081*10 <sup>-3</sup> | 3.101*10 <sup>-8</sup> |
| IgG2- C232S (IgG2A)                       | 3.515*10 <sup>4</sup>  | 1.088*10 <sup>-3</sup> | 3.095*10 <sup>-8</sup> |
| IgG2- C127S (IgG2B)                       | 3.549 *10 <sup>4</sup> | 1.096*10 <sup>-3</sup> | 3.088*10 <sup>-8</sup> |

**Table S1. Affinities of 21.4.1 Fc variants to human CD40.**

Binding constants were obtained by SPR analysis with immobilized IgGs and soluble CD40.

| Fc variant     | Inhibitory              |      |                         |       | Activating               |      |                           |      |
|----------------|-------------------------|------|-------------------------|-------|--------------------------|------|---------------------------|------|
|                | hFcγRIIB                |      | hFcγRI                  |       | hFcγRIIA <sup>R131</sup> |      | hFcγRIIIA <sup>F158</sup> |      |
|                | K <sub>D</sub> (M)      | Fold | K <sub>D</sub> (M)      | Fold  | K <sub>D</sub> (M)       | Fold | K <sub>D</sub> (M)        | Fold |
| IgG1 wild type | 3.01 X 10 <sup>-6</sup> | 1    | 5.17 X 10 <sup>-9</sup> | 1     | 1.16 X 10 <sup>-6</sup>  | 1    | 6.7 X 10 <sup>-6</sup>    | 1    |
| N297A          | n.d.b.                  | NA   | n.d.b.                  | NA    | n.d.b.                   | NA   | n.d.b.                    | NA   |
| SE             | 8.33 X 10 <sup>-8</sup> | 30.2 | 2.6 x 10 <sup>-9</sup>  | 1.1   | 9.8 X 10 <sup>-8</sup>   | 15.8 | n.d.b.                    | NA   |
| SELF           | 4.31 X 10 <sup>-8</sup> | 69.8 | 3.68 X 10 <sup>-9</sup> | 1.4   | 1.77 X 10 <sup>-8</sup>  | 65.5 | n.d.b.                    | NA   |
| V9             | 9.39 X 10 <sup>-8</sup> | 32   | 5.78 X 10 <sup>-7</sup> | 0.009 | 4.11 X 10 <sup>-6</sup>  | 0.28 | n.d.b.                    | NA   |
| V11            | 3.15 X 10 <sup>-8</sup> | 95.6 | 2.3 X 10 <sup>-7</sup>  | 0.022 | 3.84 X 10 <sup>-6</sup>  | 0.3  | n.d.b.                    | NA   |
| IgG2           | <10 <sup>-5</sup>       | NA   | n.d.b.                  | NA    | <10 <sup>-5</sup>        | NA   | <10 <sup>-5</sup>         | NA   |

**Table S2. Affinities of 21.4.1 Fc variants to human FcγRs**

Binding constants were obtained by SPR analysis.

Fold=K<sub>D</sub>(IgG1)/K<sub>D</sub>(Fc variant)

n.d.b, no detectable binding; NA, not applicable.

K<sub>D</sub> values and fold changes compared to wild type IgG1 for the SE mutant are from references (smith et al and Chu et al 2008).

## **Supplemental Experimental Procedures**

### **Up-regulation of CD54 or CD86 in human dendritic cells**

Human Monocytes (CD14<sup>+</sup>) were isolated from healthy normal donors using plastic adherence or human CD14-micro beads (Miltenyi Biotec). Monocytes were cultured with 100 ng/mL GM-CSF (Miltenyi Biotec) and 100 ng/mL IL-4. (Miltenyi Biotec). Half of the medium was removed and replenished on day 2 and day 5. Immature dendritic cells were harvested at day 6-7. For up-regulation of CD54 and CD86, immature dendritic cells were plated at 80,000 cells/well in 96 well plates. Antibodies as indicated were added to wells and incubated overnight at 37° C. Cells were harvested and stained with the indicated markers.

### **Cytokine production by human dendritic cells**

Immature DCs were derived as described above. DC (100,000 cells/well) were incubated with the indicated concentration of antibodies overnight at 37° C. Cell culture supernatants were collected and assayed for human-TNF- $\alpha$  production (CisBio).

### **SPR method for CD40-CD40L binding**

Construction, expression and purification of the human CD40 Fc fusion protein (hCD40-Fc), and trimeric IZ-hCD40L and IZ-mCD40L proteins was described previously (Xie et al., 2014). mCD40-Fc was purchased from R&D Systems Catalog # 1215-CD. Surface Plasmon resonance (SPR) studies were performed on a Biacore T100 instrument (GE Healthcare) at 25°C in a running buffer of 10 mM NaPO<sub>4</sub>, 130 mM NaCl, 0.05% p20 (PBS-T) pH 7.1. Sensor chip surfaces were prepared by immobilizing protein A to densities of ~5000 RU on a CM5 sensor chip (GE Healthcare) using standard ethyl(dimethylaminopropyl) carbodiimide (EDC)/N-hydroxysuccinimide (NHS) chemistry, with ethanolamine blocking. hCD40-Fc or mCD40-Fc fusion proteins were captured via the Fc tag on these surfaces to densities of ~200-220 RU, followed by the binding of IZ-hCD40L or IZ-mCD40L (100-0.14 nM in 3:1 dilution series) using 180 s association and 360 s dissociation times at a flow rate of 30  $\mu$ l/min. Surface regeneration between cycles was achieved using two 30s pulses of 10mM glycine pH 1.5 at 30 $\mu$ l/min.

### **PK study**

hCD40/hFc $\gamma$ R mice were injected with 80  $\mu$ g of CP-870,893 Fc variant antibodies and bled at indicated time points after dosing. Serum was stored at -80C until all time points were collected. Antibody concentration in serum was determined using a standard colorimetric ELISA assay. Briefly, assay plates were coated with 1 mg/ml of recombinant human CD40 (R&D Systems) and incubates overnight at 4C. Plates were washed three times with PBS-0.05% Tween 20, then blocked with 10% FBS in PBS. Serial dilutions of serum was added to the plates and incubated for 2h at RT then washed 3 times. Anti-human IgG HRP conjugate (Jacskon ImmunoResearch Laboratories) was used to detect anti-human CD40 antibodies. HRP substrate was added to the plates for 2-5 min; absorbance was measured at 405 nm.

## **Supplemental References**

Xie, J. H., Yamniuk, A. P., Borowski, V., Kuhn, R., Susulic, V., Rex-Rabe, S., Yang, X., Zhou, X., Zhang, Y., Gillooly, K., *et al.* (2014). Engineering of a novel anti-CD40L domain antibody for treatment of autoimmune diseases. *Journal of immunology* 192, 4083-4092.
